# Supplementary material
Source: publisher figshare collection journal article supplement (https://aacr.figshare.com/articles/dataset/_/22651596)
Supplement: Supplementary file 1 [file 40209249]

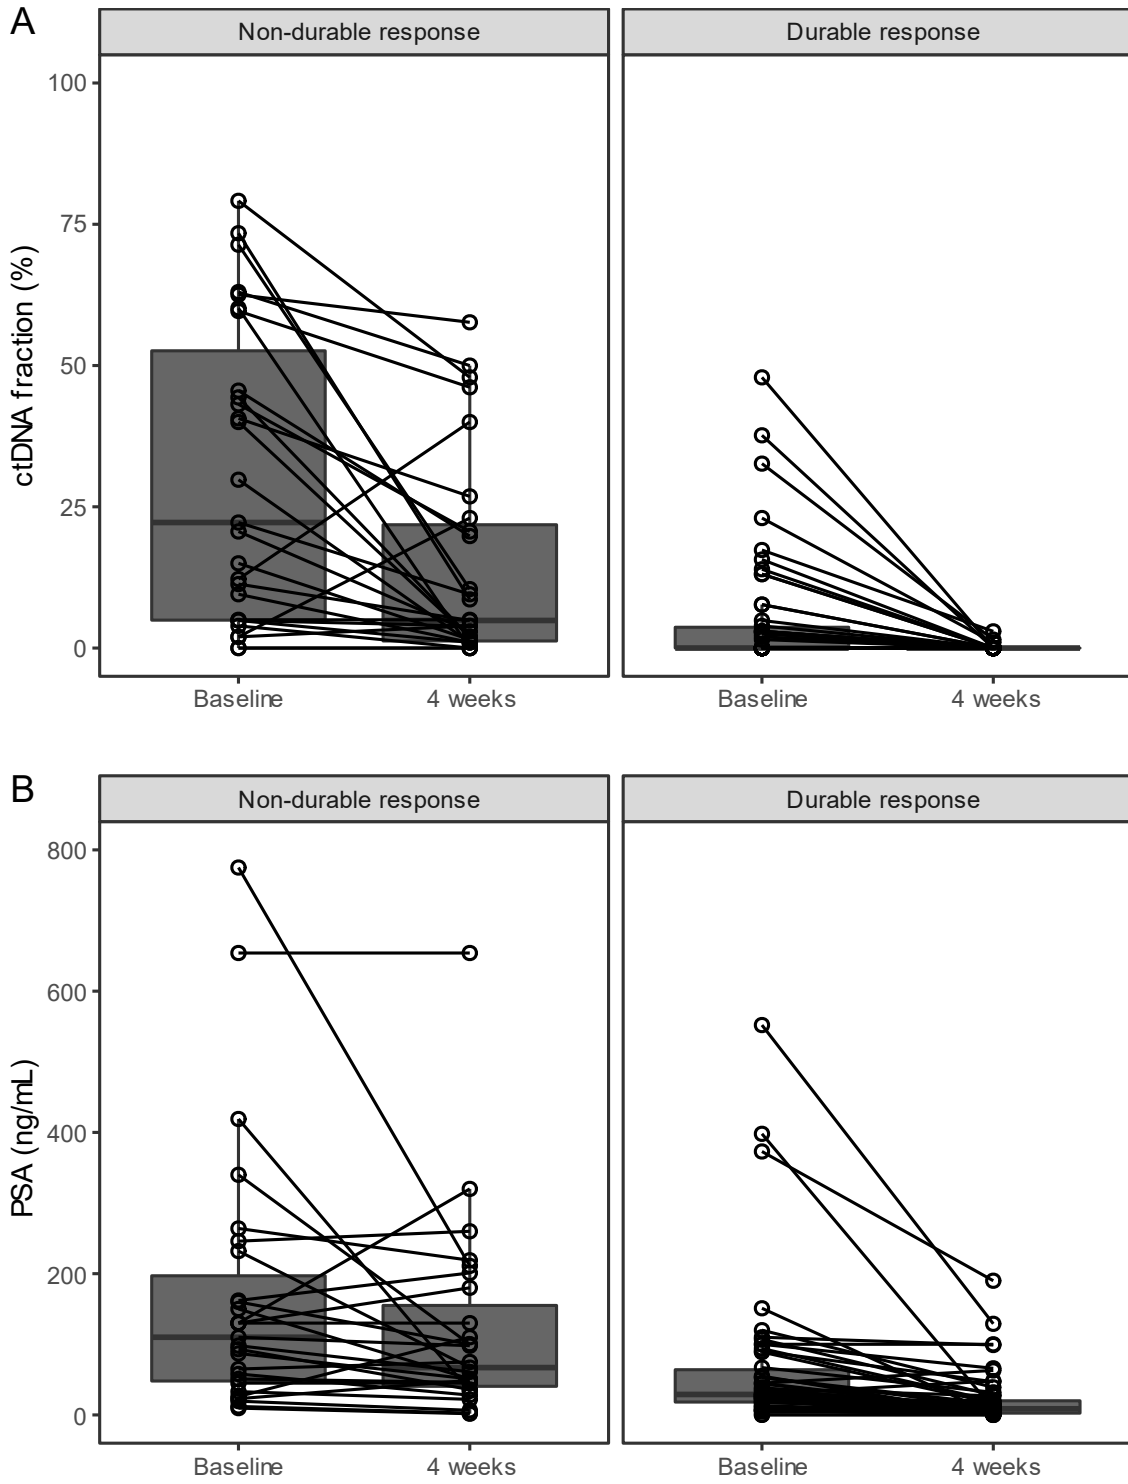

**Supplementary Figure S10:** Changes in (A) ctDNA fraction and (B) PSA levels between baseline and 4 weeks on-treatment in relation to the durability of response.
